# Supplementary material
Source: publisher figshare collection journal article supplement (https://karger.figshare.com/ndownloader/files/17433941)
Supplement: Supplementary file 1 [file 17433941]

**Supplemental Figure 1.** Coronal T1-weighted MRI with measurement of A) the interhemispheric distance (l—l) and biparietal width (←→) at the level of the 3rd ventricle, cochlea, and basilar artery and B) the transcerebellar diameter at maximal width of the cerebellar diameter [10]
